# Supplementary material for: Polysaccharide from wild morels alters the spatial structure of gut microbiota and the production of short-chain fatty acids in mice
Source: PubMed Central journal article supplement — Biosci Microbiota Food Health. 2020 Jun 6;39(4):219–26. doi: 10.12938/bmfh.2020-018 (PMC7573107; doi:10.12938/bmfh.2020-018), 2020-06-06
Supplement: bmfh-39-219-s001.pdf [file bmfh-39-219-s001.pdf]

**Supplementary Table 1.** 16S rRNA gene sequencing statistics from non-treated and MP-treated mice.

| Sample ID* | Reads     | OTUs   | Chao1  | Ace    | Coverage |
|------------|-----------|--------|--------|--------|----------|
| CTS1       | 139381.00 | 179.00 | 251.73 | 294.45 | 0.82     |
| CTS2       | 136195.00 | 122.00 | 171.00 | 187.76 | 0.84     |
| CTS3       | 60093.00  | 127.00 | 195.88 | 252.62 | 0.83     |
| CTS4       | 116899.00 | 99.00  | 147.24 | 197.96 | 0.82     |
| PS1        | 257565.00 | 146.00 | 200.47 | 245.81 | 0.81     |
| PS2        | 158830.00 | 303.00 | 336.61 | 339.94 | 0.80     |
| PS3        | 193189.00 | 239.00 | 314.30 | 366.10 | 0.80     |
| PS4        | 165920.00 | 216.00 | 308.04 | 284.82 | 0.82     |
| CTC1       | 81091.00  | 364.00 | 405.25 | 404.94 | 0.74     |
| CTC2       | 142348.00 | 354.00 | 373.19 | 375.25 | 0.81     |
| CTC3       | 85359.00  | 403.00 | 434.00 | 417.42 | 0.80     |
| CTC4       | 155577.00 | 404.00 | 435.50 | 424.58 | 0.79     |
| PC1        | 118733.00 | 415.00 | 421.12 | 423.03 | 0.81     |
| PC2        | 106759.00 | 424.00 | 434.50 | 434.67 | 0.79     |
| PC3        | 159808.00 | 414.00 | 423.63 | 423.83 | 0.78     |
| PC4        | 129272.00 | 446.00 | 453.50 | 451.69 | 0.79     |
| CTL1       | 109648.00 | 356.00 | 374.10 | 378.68 | 0.84     |
| CTL2       | 129673.00 | 391.00 | 410.69 | 414.78 | 0.81     |
| CTL3       | 125047.00 | 361.00 | 420.43 | 415.97 | 0.72     |
| CTL4       | 140260.00 | 353.00 | 410.19 | 398.70 | 0.77     |
| PL1        | 128298.00 | 392.00 | 410.91 | 408.67 | 0.79     |
| PL2        | 117647.00 | 402.00 | 426.80 | 420.02 | 0.77     |
| PL3        | 123113.00 | 404.00 | 421.65 | 414.95 | 0.77     |
| PL4        | 104284.00 | 400.00 | 418.00 | 416.72 | 0.79     |

\* CTS (PS), CTC (PC), and CTL (PL) correspond to small intestine, cecum, and colon samples, respectively, in mice of the CT (P) group.

**Supplementary Table 2.** Effects of polysaccharides extracted from morels on body weight (g), spleen weight (mg), and spleen index ( $\text{mg g}^{-1}$ ) of mice.

| Group | Body weight (g) | Spleen weight (mg) | Spleen index ( $\text{mg g}^{-1}$ ) |
|-------|-----------------|--------------------|-------------------------------------|
| CTC   | 33.78±2.09      | 142.80±12.84       | 4.25±0.57                           |
| PL    | 34.31±2.04      | 118.50±24.17       | 3.44±0.57                           |
| PM    | 34.25±1.98      | 110.30±22.95       | 3.21±0.60                           |
| PH    | 33.80±1.55      | 101.50±23.70       | 3.00±0.64                           |

T test was used to evaluate significant different for body weight, spleen weight and spleen index. Each value was presented as mean±SD. CTC: control group; PL: MP treatment group with 40 mg per kg BW of MP; PM: MP treatment group with 75 mg per kg BW of MP; PH: MP treatment group with 120 mg per kg BW of MP.
